# Supplementary material
Source: PubMed Central journal article supplement (PMC1721925)
Supplement: archdischfn_adc.2004.056317_1.pdf [file archdischfn_adc.2004.056317_1.pdf]

QUOROM statement checklist:

Although this meta-analysis is based also on non-randomized trials, the QUOROM statement checklist is filled in:

| <b>Heading:</b>             | <b>Reported:</b>                                                                        |
|-----------------------------|-----------------------------------------------------------------------------------------|
| <u>Title</u>                | Yes, Identify the report as a meta-analysis [or systematic review] of controlled trials |
| <u>Abstract:</u>            | Structured format                                                                       |
| Objectives                  | Yes.                                                                                    |
| Data sources                | Yes.                                                                                    |
| Review methods              | Yes.                                                                                    |
| Results                     | Yes.                                                                                    |
| Conclusions                 | Yes.                                                                                    |
| <u>Methods</u>              |                                                                                         |
| Introduction                | Yes, heading "Introduction".                                                            |
| Searching                   | Yes, subheading "search strategy" in "methods" and box 2.                               |
| Selection                   | Yes, subheading "selection" in "methods" and box 3.                                     |
| Validity assessment         | Yes, subheading "validity assessment" in "methods".                                     |
| Data abstraction            | Yes, subheading "data abstraction" in "methods".                                        |
| Study characteristics       | Yes, subheading "trial characteristics" in "results".                                   |
| Quantitative data synthesis | Yes, subheading "quantitative data synthesis" in "methods".                             |
| <u>Results</u>              |                                                                                         |
| Trial flow                  | Yes, figure 4 "QUODROM flow diagram".                                                   |
| Study characteristics       | Yes, subheading "trial characteristics" in "results".                                   |
| Quantitative data synthesis | Yes, subheading "quantitative data synthesis of the pharmacokinetics" in "results".     |
| <u>Discussion</u>           | Yes, heading "discussion".                                                              |
